# Supplementary material for: Whole-genome characterisation of multidrug resistant monophasic variants ofSalmonellaTyphimurium from pig production in Thailand
Source: PeerJ journal article supplement (doi:10.7717/peerj.9700), 2020-08-12
Supplement: TableS3_SGI4.xlsx [file TableS3_SGI4.xlsx]

## Sheet: Sheet1
	Supplementary table 3: SGI-4 orfs
	ORF	gene	Annotation	Product/ putative function	SLE core gene*	Size (bp)	8429 (Sal_5_S5_contigs)	8430 (Sal_6_S6_contigs)	8435 (Sal_11_S11_contigs)	8439 (172_S15_contigs)	8441 (193_S17_contigs)	8442 (543009_S18_contigs)	8443 (541007_S19_contigs)	8444 (543008_S20_contigs)	8445 (541024_S21_contigs)	8446 (541025_S22_contigs)	8447 (541013_S23_contigs)	8449 (543010_S25_contigs)	8450 (60_S26_contigs)	8451 (117_S27_contigs)	8452 (173_S28_contigs)	8460 (541006_S36_contigs)	8461 (541011_S37_contigs)	8462 (541012_S38_contigs)	8463 (21_S39_contigs)
	1	parA	parA	Chromosome partitioning ATPase	Yes	873	1	1	1	1	1	1	1	I	1	1	1	1	1	1	1	1	1	1	1
	2		Hypothetical protein	Multispecies hypothetical - unknown	Yes	357	1	1	1	1	1	1	1	1	1	1	1	1	1	1	1	1	1	1	1
	3		Hypothetical protein	Multispecies hypothetical - unknown	Yes	243	1	1	1	1	1	1	1	1	1	1	1	1	1	1	1	1	1	1	1
	4	dnaB	dnaB	Replicative DNA helicase	Yes	1371	1	1	1	1	1	1	1	1	1	1	1	1	1	1	1	1	1	1	1
	5	parB	ParB	parB nuclease domain containing protein	Yes	1665	1	1	1	1	1	1	1	1	1	1	1	1	1	2	1	1	1	1	1
	6		Hypothetical protein	Unknown		726	1	1	1	1	1	1	1	1	1	1	1	1	1	1	1	1	1	1	1
	7		Hypothetical protein	Appears to be only ICE related from searches		426	1	1	1	1	1	1	1	1	1	1	1	1	1	1	1	1	1	1	1
	8		Hypothetical protein	ICE related protein		609	1	1	1	1	1	1	1	1	1	1	1	1	1	1	1	1	1	1	1
	9		Hypothetical protein	ICE related protein	Yes	249	1	1	1	1	1	1	1	1	1	1	1	1	1	1	1	1	1	1	1
	10		Hypothetical protein	Helix turn helix - possible DNA binding/transcriptional regulator	Yes	1239	1	1	1	1	1	1	1	1	1	1	1	1	1	1	1	1	1	1	1
	11		Hypothetical protein	Repeat region & N-terminal signal peptide	Yes	435	1	1	1	1	2	1	1	1	1	1	1	1	1	3	1	1	1	1	2
	12		Integrating conjugative element protein	ICE related protein	Yes	756	1	1	1	1	1	1	1	1	1	1	1	1	1	1	1	1	1	1	1
	13	topB	DNA Topoisomerase III	DNA Topoisomerase	Yes	2046	1	1	1	1	1	1	1	1	1	1	1	1	1	1	1	1	1	1	1
	14		Hypothetical protein	ICE related protein	Yes	465	1	1	1	1	1	1	1	1	1	1	1	1	1	1	1	1	1	1	1
	15		Hypothetical protein	ICE related protein	Yes	204	1	1	1	1	1	1	1	1	1	1	1	1	1	1	1	1	1	1	1
	16	ssB	ssB	single stranded DNA binding protein	Yes	561	1	1	1	1	1	1	1	1	1	1	1	1	1	1	1	1	1	1	1
	17		Hypothetical protein	ICE related protein	Yes	237	1	1	1	1	1	1	1	1	1	1	1	1	1	1	1	1	1	1	1
	18		Hypothetical protein	ICE related protein	Yes	264	1	1	1	1	1	1	1	1	1	1	1	1	1	1	1	1	1	1	1
	19	pilL	pilL	Type IV B pilus protein	Yes	597	1	1	1	1	1	1	1	1	1	1	1	1	1	1	1	1	1	1	1
	20		Hypothetical protein	Unknown: Transmembrane domain & coiled-coil domain	Yes	723	1	1	1	1	1	1	1	1	1	1	1	1	1	1	1	1	1	1	1
	21		Hypothetical protein	Conjugative transfer protein	Yes	705	1	1	1	1	1	1	1	I	1	1	1	1	1	1	1	1	1	1	1
	22		lytA - lytic transglycosylase	lytic transglycosylase	Yes	675	1	1	1	1	1	1	1	1	1	1	1	1	1	1	1	1	1	1	1
	23		Conjugative transfer protein	Conjugative transfer protein		513	1	1	1	1	1	1	1	1	1	1	1	1	1	1	1	1	1	1	1
	24		Restriction endonuclease	Restriction endonuclease	Yes	600	1	1	1	1	1	1	1	1	1	1	1	1	1	1	1	1	1	1	1
	25		Hypothetical protein	Unknown		504	1	1	1	1	1	1	1	1	1	1	1	1	1	1	1	1	1	1	1
	26	traD	traD	conjugative coupling factor TraD	Yes	2091	1	1	1	1	1	1	1	1	1	1	1	1	1	1	1	1	1	1	1
	27		ICE membrane protein	ICE related membrane protein	Yes	759	1	1	1	1	1	1	1	1	1	1	1	1	1	1	1	1	1	1	1
	28	arsR	arsR	Arsenic resistance operon repressor		354	1	1	1	1	1	1	1	1	1	1	1	1	1	1	1	1	1	1	1
	29	arsD	arsD	Resistance operon trans acting repressor		363	1	1	1	1	1	1	1	1	1	1	1	1	1	1	1	1	1	1	1
	30	arsA	arsA	Arsenic pump-driving ATPase		1752	1	1	1	1	1	1	1	2	1	1	1	1	1	1	1	1	1	1	1
	31	arsB	arsB	ArsB pump membrane protein		1290	1	1	1	1	1	1	1	1	1	1	1	1	1	1	1	1	1	1	1
	32	arsC	arsC	Arsenate reductase		426	1	1	1	1	1	1	1	1	1	1	1	1	1	1	1	1	1	1	1
	33	bar	bar	Posphinothricin acetyltransferase		537	1	1	1	1	1	1	1	1	1	1	1	1	1	1	1	1	1	1	1
	34	arsA	arsA	Arsenate pump-driving ATPase		1758	1	1	1	1	1	1	1	1	1	1	1	1	1	1	1	1	1	1	1
	35	arsD	arsD	Resistance operon trans acting repressor		363	1	1	1	1	1	1	1	1	1	1	1	1	1	1	1	1	1	1	1
	36	sigL	sigL	DNA directed RNA polymerse sigma-70 factor		546	1	1	1	1	1	1	1	1	1	1	1	1	1	1	1	1	1	1	1
	37		Hypothetical protein	ICE/plasmid related protein	Yes	342	1	1	1	1	1	1	1	1	1	1	1	1	1	1	1	1	1	1	1
	38		Hypothetical protein	ICE related protein	Yes	243	1	1	1	1	1	1	1	1	1	1	1	1	1	1	1	1	1	1	1
	39	ssb	Hypothetical protein	ICE related/signal peptide N-terminal, 2 transmembrane domains/single stranded binding protein		387	1	1	1	1	1	1	1	1	1	1	1	1	1	1	1	1	1	1	1
	40		Hypothetical protein	ICE retaed protein/ 2 transmembrane domains		357	1	1	1	1	1	1	1	1	1	1	1	1	1	1	1	1	1	1	1
	41		Hypothetical protein	Membrane lipoprotein		660	1	1	1	1	1	1	1	1	1	1	1	1	1	1	1	1	1	1	1
	42		Hypothetical protein	Conjugal transfer protein/ N-terminal signal domain	Yes	936	1	1	1	1	1	1	1	1	1	1	1	1	1	1	1	1	1	1	1
	43		Hypothetical protein	Conjugation protein/ N-terminal signal domain	Yes	1506	1	1	1	1	1	1	1	1	1	1	1	1	1	1	1	1	1	1	1
	44		Hypothetical protein	Conjugal transfer lipoprotein/ 1 transmembrane domain	Yes	837	1	1	1	1	1	1	1	1	1	1	1	1	1	1	1	1	1	1	1
	45		Pilus protein	F pilus assembly Type-IV secretion system for plasmid transfer/ATPase	Yes	2865	1	1	1	1	1	1	1	1	1	1	1	1	1	1	1	1	1	1	1
	46		Hypothetical protein	Acetyltransferase	Yes	387	1	1	1	1	1	1	1	1	1	1	1	1	1	1	1	1	1	1	1
	47		Hypothetical protein	Unknown	Yes	489	1	1	1	1	1	1	1	1	1	1	1	1	1	1	1	1	1	1	1
	48		Hypothetical protein	Membrane protein/ N-terminal signal domain	Yes	96	1	1	1	1	1	1	1	1	1	1	1	1	1	1	1	1	1	1	1
	49		Hypothetical protein	ICE related protein	Yes	402	1	1	1	1	1	1	1	1	1	1	1	1	1	1	1	1	1	1	1
	50	traU	Hypothetical protein	ICE related protein	Yes	993	1	1	1	1	1	1	1	2	1	1	1	1	1	1	1	1	1	1	1
	51		Hypothetical protein	ICE related protein	Yes	1434	1	1	1	1	1	1	1	1	1	1	1	1	1	1	1	1	1	1	1
	52		Hypothetical protein	Unknown	Yes	354	1	1	1	1	1	1	1	1	1	1	1	1	1	1	1	1	1	1	1
	53	traG	Hypothetical protein	Conjugal transfer protein TraG - Type 4 coupling protein	Yes	1542	1	1	1	1	1	1	1	1	1	1	1	1	1	1	1	1	1	1	1
	54		Hypothetical protein	Unknown	Yes	180	1	1	1	1	1	1	1	1	1	1	1	1	1	1	1	1	1	1	1
	55		Hypothetical protein	Unkown		558	1	1	1	1	1	1	1	X	1	1	1	1	I	1	1	1	X	X	1
	56		Unknown annotation (ykhgJ)	Putative zinc- or iron-chelating domain		702	1	1	1	1	1	1	2	1	1	1	1	1	1	I	1	1	I	3	I
	57	xerC	xerC	Tyrosine recombinase	Yes	903	1	1	1	1	1	1	1	1	1	2	1	1	1	1	1	1	1	1	1
	58		Hypothetical protein	Unknown	Yes	588	1	1	1	1	1	1	1	1	1	1	1	1	1	1	1	1	1	1	1
	59		Hypothetical protein	Unknown	Yes	339	1	1	1	1	1	1	1	1	1	1	1	1	1	1	1	1	1	1	1
	60		Hypothetical protein	Unknown	Yes	1005	1	1	1	1	1	1	1	1	1	1	1	1	1	1	1	1	1	1	1
	61		Hypothetical protein	Unknown	Yes	618	1	1	1	1	1	1	1	1	1	1	1	1	1	1	1	1	1	1	1
	62	traC	traC-like (Also annotated as ArdC - antirestriction)	DNA primase TraC	Yes	1056	1	1	1	1	1	1	1	1	1	1	1	1	1	1	1	1	1	1	1
	63		Hypothetical protein	Unknown	Yes	936	1	1	1	1	1	1	1	1	1	1	1	1	1	1	1	1	1	1	1
	64	int	Integrase	integrase/N6 methylase domain	Yes	684	1	1	1	1	1	1	1	1	1	1	1	1	1	1	1	1	1	1	1
	65		Multispecies exported protein	Multispecies exported protein		351	1	1	1	1	1	1	1	1	1	1	1	1	1	1	1	1	1	1	1
	66	silE	Multispecies copper or silver binding protein (silE)	Silver binding protein (Note of possible copper binding)		432	X	X	X	X	X	X	X	X	X	X	X	X	X	X	X	X	X	X	X
	67	silS	silS	Two componant histidine kinase sensor		1476	1	1	1	1	1	1	1	1	1	1	1	1	1	1	1	1	1	1	1
	68	silR	silR (Multispecies DNA binding response regulator)	Copper-sensing two-component system response regulator		681	X	X	X	X	X	X	X	X	X	X	X	X	X	X	X	X	X	X	X
	69	silC	silC prescursor	Copper/silver efflux system		1386	1	1	2	1	1	1	1	1	1	1	1	1	1	I	1	1	1	1	1
	70	silF	silF	Cation efflux system protein silF precursor		354	1	1	1	1	1	1	1	1	1	1	1	1	1	1	1	2	I	1	1
	71	silB	silB	Cation efflux system protein silB precursor - substrate binding protein		1293	1	1	1	1	1	1	1	1	1	1	1	1	1	1	1	1	1	1	1
	72	silA	Multispecies cation transporter silA	Cation efflux system protein - multi-heavy metal efflux pump		3147	1	1	1	1	1	1	1	1	1	1	1	1	2	1	1	1	1	1	1
	73		Hypothetical protein	Unknown - Possible metal binding protein		441	1	1	1	1	1	1	1	1	1	1	1	1	1	1	1	1	1	1	1
	74	silP	Copper translocating ATPase	Silver/copper exporting ATPase		2448	1	1	1	1	1	1	1	1	1	1	1	1	1	1	1	1	1	1	1
	75		Hypothetical protein	Unknown		189	1	1	1	1	1	1	1	1	1	1	1	1	1	1	1	1	1	1	1
	76	pcoG	Multispecies copper resistance protein	Silver binding protein (Note of possible copper binding)		804	1	1	1	1	1	1	1	2	1	1	1	1	1	1	1	1	1	1	1
	77	pcoE	pcoE	Twin-arginine translocation pathway signal:copper-resistance protein CopA		450	1	1	1	1	1	1	1	1	1	1	1	1	1	1	1	1	1	1	1
	78	pcoA	pcoA	Copper-resistance protein PcoA		1818	1	1	1	1	1	1	1	1	1	1	1	1	1	1	1	1	1	1	1
	79	pcoB	pcoB	Copper resistance protein PcoB - Cu(II) binding protein		897	1	1	1	1	1	1	1	I	1	1	1	1	1	1	1	1	1	1	1
	80	pcoC	pcoC	Multispecies metallochaperone		381	1	1	1	1	1	1	1	1	1	1	1	1	1	1	1	1	1	1	1
	81	pcoD	pcoD	Copper resistance protein PcoD		930	1	1	1	1	1	1	1	1	1	1	1	1	1	1	1	1	2	1	I
	82	pcoR	DNA-binding response regulator	Transcriptional activator CopR		681	1	1	1	1	1	1	1	1	1	1	1	1	1	1	1	1	1	1	1
	83	pcoS	silS	Two componant heavy metal sensor silS		1401	1	1	1	1	1	1	1	1	1	1	1	1	1	1	1	I	1	2	I
	84	pcoE	pcoE	putative copper-binding protein PcoE precursor		435	1	1	1	1	1	1	1	1	1	1	1	1	1	1	1	1	1	1	1
	85	uvrB	DNA helicase	DNA helicase	Yes	1482	1	1	1	1	1	1	1	2	1	1	1	1	1	1	1	1	1	1	1
	86	traI	Relaxase (traI)	Putative helicase - ICE relaxase	Yes	1590	1	1	1	1	1	1	1	1	1	1	1	1	1	1	1	1	1	1	1
	87	xerD	Recombinase XerD	Tyrosine recombinase XerD	Yes	1011	1	1	1	1	1	1	1	1	1	1	1	1	1	1	1	1	1	1	1
							0.977011	0.977011	0.977011	0.977011	0.977011	0.977011	0.977011	0.965517	0.977011	0.977011	0.977011	0.977011	0.977011	0.977011	0.977011	0.977011	0.965517	0.965517	0.977011
	*As described in Branchu et al.
