# Supplementary figures and images for: Whole-genome characterisation of multidrug resistant monophasic variants ofSalmonellaTyphimurium from pig production in Thailand
Source: PeerJ journal article supplement (doi:10.7717/peerj.9700), 2020-08-12

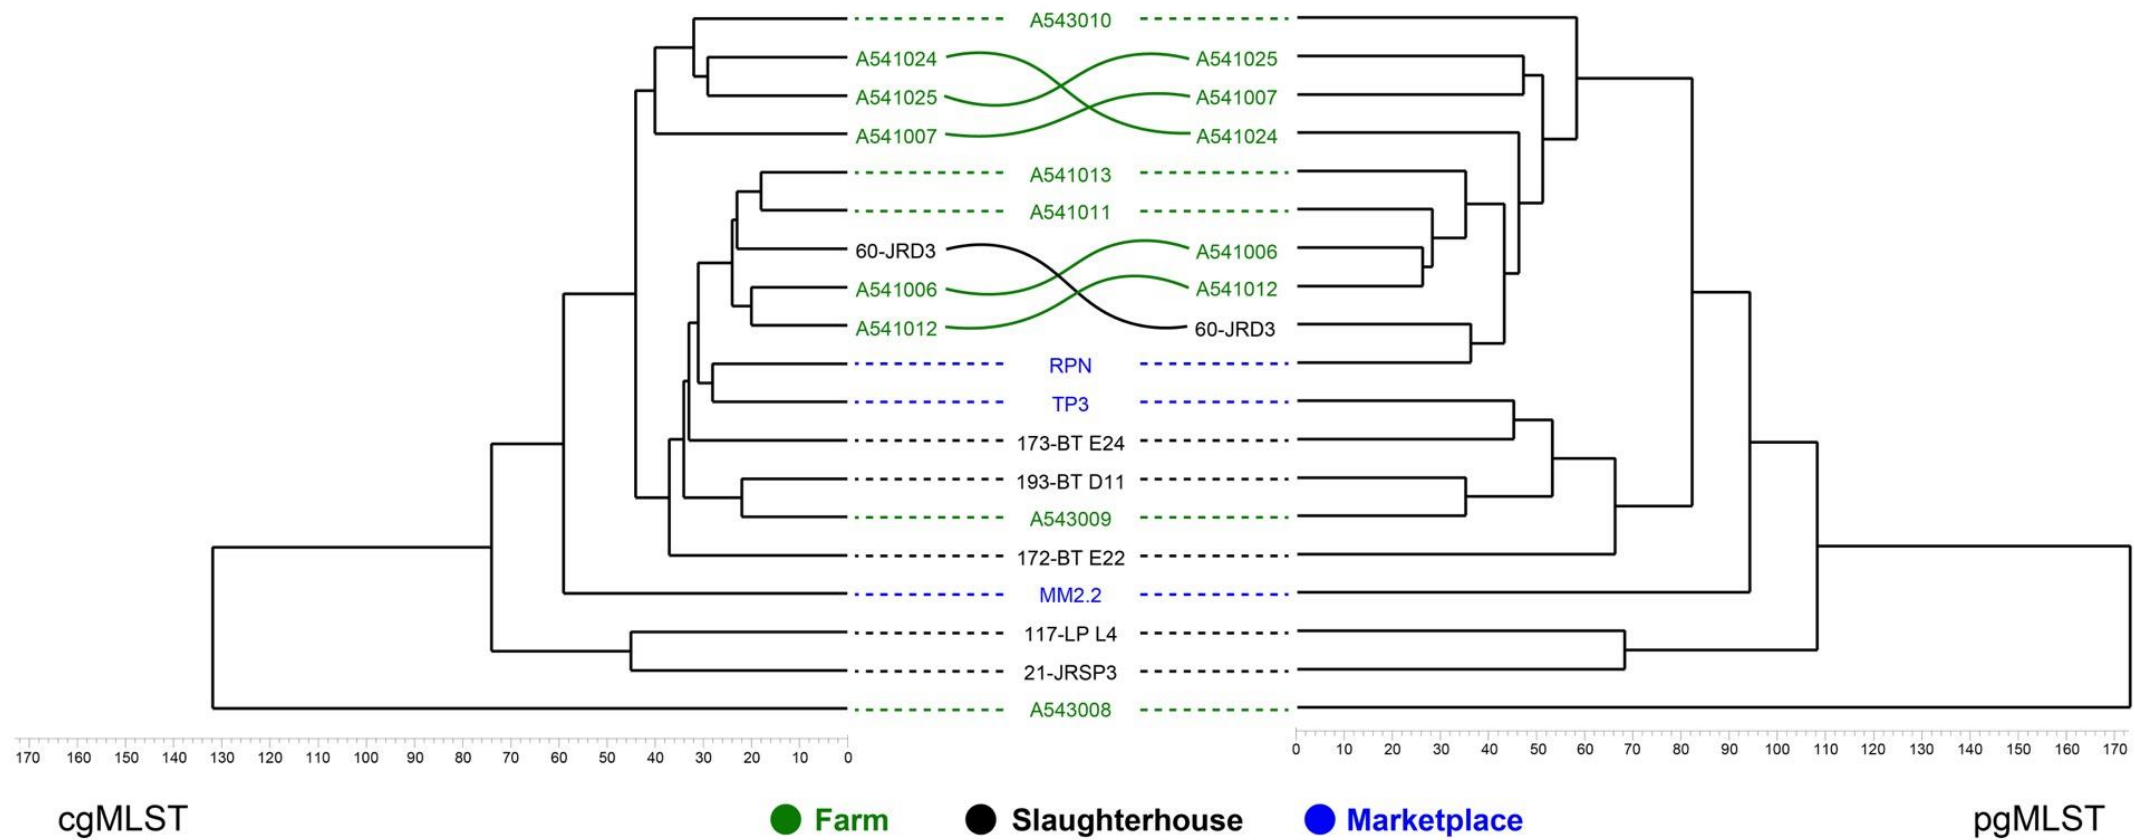

Supplement: Supplementary_Figure_1.pdf [file Supplementary_Figure_1.pdf]
